# Supplementary material for: Risk Analysis of Latent Tuberculosis Infection among Health Workers Compared to Employees in Other Sectors
Source: MDPI journal article supplement (doi:10.3390/ijerph17134643), 2020-06-28
Supplement: s1 [file s1]

1 Supplement

2 **Table S1.** Group comparison including subjects born in a TB high-risk country after PS matching 1:10.

|                                         | HW<br>(n = 1030) | non-HW<br>(n = 103) | p-value |
|-----------------------------------------|------------------|---------------------|---------|
| Age (mean (SD))                         | 35.1 (10.6)      | 35.7 (10.8)         | 0.583   |
| Sex (male)                              | 223 (21.7%)      | 23 (22.3%)          | 0.900   |
| TB history                              | 44 (4.3%)        | 4 (3.9%)            | 1.000   |
| Country of birth (other than Germany)   | 130 (12.6%)      | 11 (10.7%)          | 0.641   |
| Positive IGRA test ( $\geq 0.35$ IU/ml) | 74 (7.2%)        | 4 (3.9%)            | 0.304   |

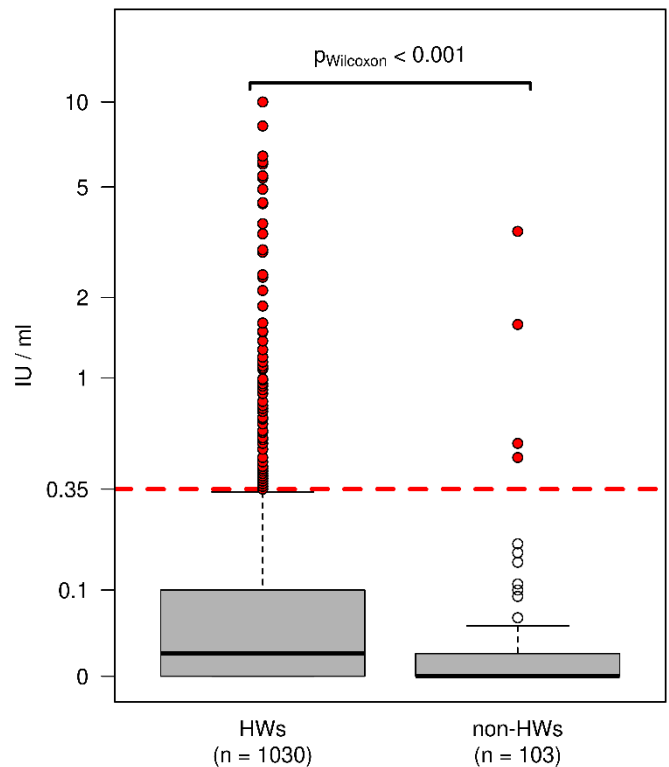

3  
4 **Figure S1.** Amount of INF $\gamma$ -value (tube TB1) by group including subjects born in a TB high-risk  
5 country (HW vs. non-HW)

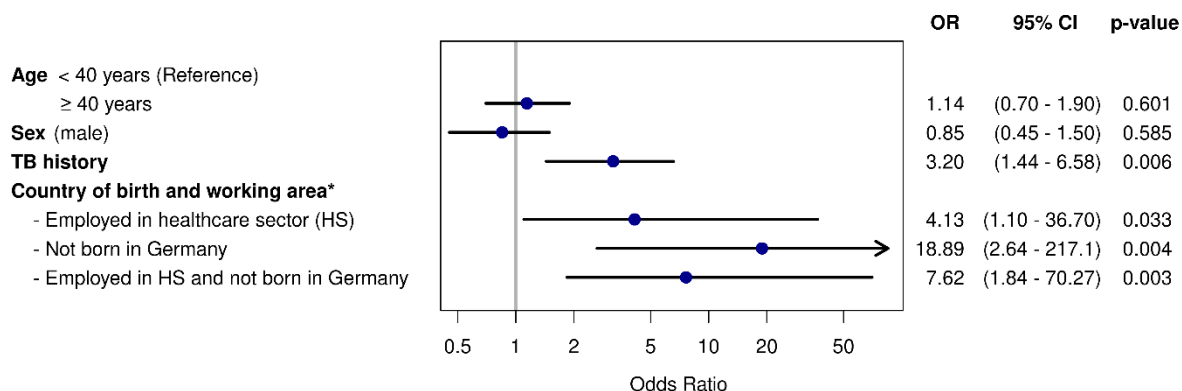

6 \* Reference: born in Germany and not employed in healthcare sector

7 **Figure S2.** Forest plot for the results of the logistic regression model with IGRA test positive as the  
8 dependent variable. The variables age, sex, TB history and all four possible combinations of country  
9 of birth (including subjects born in a TB high-risk country) and employment as HW are depicted as  
10 independent variables.
